# Supplementary material for: Barriers to cross-disciplinary knowledge flow: The case of medical education research
Source: Perspect Med Educ. 2021 Oct 14;11(3):149–55. doi: 10.1007/s40037-021-00685-6 (PMC9240116; doi:10.1007/s40037-021-00685-6)
Supplement: Supplementary file 2 — Fig. S1 Distribution of medical education research citations (n = 1,433) per research cluster. Data presented in percentage [file 40037_2021_685_MOESM2_ESM.xlsx]

## Sheet: Sheet1
Fig. 1.	Distribution of medical education research citations (n=1,433) per research cluster. Data presented in percentage.																						total	Other
	Applied Health Research (HSR/clin)	Medical Education	Interdisciplinary Health	Disciplinary / Institutionalised Research Areas	Education	Topic-Centered (non health)																	1433	1
	0.4	0.4	0.08	0.06	0.03	0.03
