# Supplementary material for: Barriers to cross-disciplinary knowledge flow: The case of medical education research
Source: Perspect Med Educ. 2021 Oct 14;11(3):149–55. doi: 10.1007/s40037-021-00685-6 (PMC9240116; doi:10.1007/s40037-021-00685-6)
Supplement: Supplementary file 3 — Fig. S2 Distribution of higher education research citations (n = 596) per research cluster. Data presented in percentage [file 40037_2021_685_MOESM3_ESM.xlsx]

## Sheet: Sheet1
Fig. S2 Distribution of higher education research citations (n=598) per research cluster. Data presented in percentage
	Higher Education	Disciplinary / Institutionalised Research Areas	Education	Topic-Centered (non health)	Profession / Science Education
Higher Education	0.36	0.26	0.19	0.15	0.03
