# Supplementary material for: Barriers to cross-disciplinary knowledge flow: The case of medical education research
Source: Perspect Med Educ. 2021 Oct 14;11(3):149–55. doi: 10.1007/s40037-021-00685-6 (PMC9240116; doi:10.1007/s40037-021-00685-6)
Supplement: Supplementary file 4 — Fig. S3 Disciplinary breakdown (n = 92) for medical education research. Data presented in percentage [file 40037_2021_685_MOESM4_ESM.xlsx]

## Sheet: Sheet1
Fig. 3.	Disciplinary breakdown (n=92) for medical education research. Data presented in percentage.
Others*: Statistic, Cognitive Sciences.
		Psychology	Sociology / Anthropology	Business, Management, Organisation	Social Psychology	Humanities / Philosophy	Biology	Others*
		0.67	0.12	0.07	0.04	0.04	0.03	0.02
