# Supplementary material for: Barriers to cross-disciplinary knowledge flow: The case of medical education research
Source: Perspect Med Educ. 2021 Oct 14;11(3):149–55. doi: 10.1007/s40037-021-00685-6 (PMC9240116; doi:10.1007/s40037-021-00685-6)
Supplement: Supplementary file 5 — Fig. S4 Disciplinary breakdown (n = 154) for higher education research. Data presented in percentage [file 40037_2021_685_MOESM5_ESM.xlsx]

## Sheet: Sheet1
Fig. 4.	Disciplinary breakdown (n=154) for higher education research. Data presented in percentage
Social Sciences miscellaneous*: Communication (n=2), Human Geography (n=1), Geography (n=1), Policy Studies (n=1), STS (n=1), History (n=1).
Economics	Political Science	Psychology	Sociology / Anthropology	Finance, Management, Business, Organisation	Social Sciences miscellaneous*	Statistics	Women Studies	Humanities / Philosophy
0.25	0.24	0.15	0.14	0.1	0.05	0.03	0.02	0.02
