# Supplementary material for: Barriers to cross-disciplinary knowledge flow: The case of medical education research
Source: Perspect Med Educ. 2021 Oct 14;11(3):149–55. doi: 10.1007/s40037-021-00685-6 (PMC9240116; doi:10.1007/s40037-021-00685-6)
Supplement: Supplementary file 6 — Fig. S5 Academic unit appointment of 1st author of the selected articles in medical education journals (n = 64). Data presented in percentage [file 40037_2021_685_MOESM6_ESM.xlsx]

## Sheet: Sheet1
	Fig. 5.	Academic unit appointment of 1st author of the selected articles in medical education journals (n=64). Data presented in percentage.
	Medical Academic Unit* Includes one department of pharmacy and one faculty of health care. All other units located in a medical school.
	Medical Academic Unit*	Psychology	Kinesiology	Education	Anthropology	Private Research Firm
	0.89	0.03	0.03	0.02	0.02	0.02
