# Supplementary material for: Barriers to cross-disciplinary knowledge flow: The case of medical education research
Source: Perspect Med Educ. 2021 Oct 14;11(3):149–55. doi: 10.1007/s40037-021-00685-6 (PMC9240116; doi:10.1007/s40037-021-00685-6)
Supplement: Supplementary file 7 — Fig. S6 Academic unit of 1st author of the selected articles in higher education (n = 41). Data presented in percentage [file 40037_2021_685_MOESM7_ESM.xlsx]

## Sheet: Sheet1
Fig. 6	Academic unit of 1st author of the selected articles in higher education (n=41). Data presented in percentage
	Education / Higher Education	Business / Management / Organization	Sociology / Political Sc. / Communication / Geography	Psychology	Economics	STS / interdisciplinary units on Knowledge, Education, Technology	Engineering	Languages / Cultures / Linguistics	Life and natural sciences	Health
	0.37	0.12	0.12	0.1	0.07	0.07	0.05	0.05	0.02	0.02
